# Supplementary material
Source: PubMed Central journal article supplement (PMC3757531)
Supplement: Supp_Table1.pdf [file Supp_Table1.pdf]

## Supplementary Data

SUPPLEMENTARY TABLE S1. OVERNIGHT SOF-SENSOR CONTINUOUS GLUCOSE MONITORING WITH PARADIGM PUMP POINT ACCURACY FOR EACH STUDY

| <i>Study, comparison</i>                         | <i>Number of pairs</i> | <i>Median difference (mg/dL)</i> | <i>Median RAD<sup>a</sup></i> | <i>% ISO<sup>b</sup></i> |
|--------------------------------------------------|------------------------|----------------------------------|-------------------------------|--------------------------|
| <b>A<sup>9</sup> (n=24 nights)</b>               |                        |                                  |                               |                          |
| Overall                                          | 419                    | -1                               | 7%                            | 93%                      |
| Reference glucose (mg/dL)                        |                        |                                  |                               |                          |
| ≤70                                              | 91                     | -1                               | 8%                            | 100%                     |
| 71-120                                           | 94                     | -5                               | 7%                            | 90%                      |
| 121-180                                          | 104                    | +5                               | 6%                            | 92%                      |
| >180                                             | 130                    | +2                               | 7%                            | 90%                      |
| <b>B<sup>7</sup> (n=24 nights)</b>               |                        |                                  |                               |                          |
| Overall                                          | 649                    | -7                               | 12%                           | 72%                      |
| Reference glucose (mg/dL)                        |                        |                                  |                               |                          |
| ≤70                                              | 20                     | +24                              | 35%                           | 40%                      |
| 71-120                                           | 149                    | +4                               | 16%                           | 66%                      |
| 121-180                                          | 266                    | -10                              | 13%                           | 67%                      |
| >180                                             | 214                    | -13                              | 9%                            | 87%                      |
| <b>C<sup>8</sup> (n=15 nights)</b>               |                        |                                  |                               |                          |
| Overall                                          | 1,535                  | +4                               | 13%                           | 72%                      |
| Reference glucose (mg/dL)                        |                        |                                  |                               |                          |
| ≤70                                              | 79                     | +20                              | 36%                           | 42%                      |
| 71-120                                           | 935                    | +5                               | 12%                           | 76%                      |
| 121-180                                          | 389                    | -3                               | 14%                           | 70%                      |
| >180                                             | 132                    | -5                               | 11%                           | 70%                      |
| <b>D<sup>10</sup> (n=24 nights)</b>              |                        |                                  |                               |                          |
| Overall                                          | 807                    | -4                               | 13%                           | 70%                      |
| Reference glucose (mg/dL)                        |                        |                                  |                               |                          |
| ≤70                                              | 6                      | +4                               | 6%                            | 100%                     |
| 71-120                                           | 466                    | -3                               | 13%                           | 65%                      |
| 121-180                                          | 243                    | -1                               | 11%                           | 80%                      |
| >180                                             | 92                     | -36                              | 18%                           | 64%                      |
| <b>E (unpublished) (n=12 nights)<sup>c</sup></b> |                        |                                  |                               |                          |
| Overall                                          | 217                    | -6                               | 18%                           | 55%                      |
| Reference glucose (mg/dL)                        |                        |                                  |                               |                          |
| ≤70                                              | 14                     | +22                              | 36%                           | 36%                      |
| 71-120                                           | 69                     | +2                               | 18%                           | 57%                      |
| 121-180                                          | 84                     | -20                              | 16%                           | 58%                      |
| >180                                             | 50                     | -33                              | 16%                           | 54%                      |

Nighttime was defined as 10 p.m.–6 a.m.

<sup>a</sup>Relative absolute difference (RAD)=absolute difference/reference. Data are median values (25<sup>th</sup>, 75<sup>th</sup> percentiles).

<sup>b</sup>International Organization for Standardization (ISO) criteria are continuous glucose monitoring measurements within ±15 mg/dL for reference glucose values ≤75 mg/dL and within ±20% for reference glucose values >75 mg/dL.

<sup>c</sup>Study E was coordinated by the Jaeb Center; data were acquired by the Stanford University and Barbara Davis Center clinical teams and are on file at the Jaeb Center.
