# Supplementary material
Source: PubMed Central journal article supplement (PMC3757531)
Supplement: Supp_Table2.pdf [file Supp_Table2.pdf]

SUPPLEMENTARY TABLE S2. OVERNIGHT ENLITE CONTINUOUS GLUCOSE MONITORING WITH VEO PUMP POINT ACCURACY FOR EACH STUDY

| <i>Study, comparison</i>                             | <i>Number of pairs</i> | <i>Median difference (mg/dL)</i> | <i>Median RAD<sup>a</sup></i> | <i>% ISO<sup>b</sup></i> |
|------------------------------------------------------|------------------------|----------------------------------|-------------------------------|--------------------------|
| E (unpublished) ( <i>n</i> = 12 nights) <sup>c</sup> |                        |                                  |                               |                          |
| Overall                                              | 222                    | -15                              | 15%                           | 67%                      |
| Reference glucose (mg/dL)                            |                        |                                  |                               |                          |
| ≤70                                                  | 14                     | +6                               | 8%                            | 93%                      |
| 71–120                                               | 74                     | -2                               | 14%                           | 65%                      |
| 121–180                                              | 84                     | -25                              | 16%                           | 63%                      |
| >180                                                 | 50                     | -34                              | 16%                           | 70%                      |
| F <sup>6</sup> ( <i>n</i> = 15 nights)               |                        |                                  |                               |                          |
| Overall                                              | 275                    | -38                              | 27%                           | 33%                      |
| Reference glucose (mg/dL)                            |                        |                                  |                               |                          |
| ≤70                                                  | 11                     | -15                              | 25%                           | 55%                      |
| 71–120                                               | 75                     | -32                              | 37%                           | 12%                      |
| 121–180                                              | 97                     | -38                              | 24%                           | 36%                      |
| >180                                                 | 92                     | -48                              | 22%                           | 45%                      |
| G (unpublished) ( <i>n</i> = 24 nights) <sup>c</sup> |                        |                                  |                               |                          |
| Overall                                              | 164                    | -8                               | 14%                           | 71%                      |
| Reference glucose (mg/dL)                            |                        |                                  |                               |                          |
| ≤70                                                  | 52                     | -4                               | 21%                           | 73%                      |
| 71–120                                               | 50                     | -9                               | 11%                           | 66%                      |
| 121–180                                              | 27                     | +5                               | 10%                           | 70%                      |
| >180                                                 | 35                     | -27                              | 13%                           | 74%                      |
| H (unpublished) ( <i>n</i> = 30 nights) <sup>c</sup> |                        |                                  |                               |                          |
| Overall                                              | 1,005                  | -11                              | 13%                           | 73%                      |
| Reference glucose (mg/dL)                            |                        |                                  |                               |                          |
| ≤70                                                  | 45                     | -3                               | 17%                           | 78%                      |
| 71–120                                               | 492                    | -9                               | 13%                           | 69%                      |
| 121–180                                              | 351                    | -14                              | 13%                           | 78%                      |
| >180                                                 | 117                    | -16                              | 13%                           | 74%                      |

Nighttime was defined as 10 p.m.–6 a.m.

<sup>a</sup>Relative absolute difference (RAD) = absolute difference/reference. Data are median values (25<sup>th</sup>, 75<sup>th</sup> percentiles).

<sup>b</sup>International Organization for Standardization (ISO) criteria are continuous glucose monitoring measurements within ±15 mg/dL for reference glucose values ≤75 mg/dL and within ±20% for reference glucose values >75 mg/dL.

<sup>c</sup>Study E was coordinated by the Jaeb Center; data were acquired by the Stanford University and Barbara Davis Center clinical teams and are on file at the Jaeb Center. Study G was run by R. Hovorka at Cambridge University, and a data subset was provided to the Jaeb Center; data are on file at both Cambridge University and the Jaeb Center. Study H was run by E. Damiano at Boston University, and a data subset was provided to the Jaeb Center; data are on file at both Boston University and the Jaeb Center.
