# Supplementary material
Source: PubMed Central journal article supplement (PMC3757531)
Supplement: Supp_Table3.pdf [file Supp_Table3.pdf]

SUPPLEMENTARY TABLE S3. COMPARISON OF OVERNIGHT SOF-SENSOR WITH PARADIGM PUMP AND ENLITE CONTINUOUS GLUCOSE MONITORING WITH VEO PUMP POINT ACCURACY BASED ON REFERENCE SOURCE

|                               | <i>Number of pairs</i> |               | <i>Difference<sup>a</sup></i> |                | <i>RAD<sup>b</sup></i> |                | <i>ISO<sup>c</sup></i> |               |
|-------------------------------|------------------------|---------------|-------------------------------|----------------|------------------------|----------------|------------------------|---------------|
|                               | <i>Sof-Sensor</i>      | <i>Enlite</i> | <i>Sof-Sensor</i>             | <i>Enlite</i>  | <i>Sof-Sensor</i>      | <i>Enlite</i>  | <i>Sof-Sensor</i>      | <i>Enlite</i> |
| <b>Reference source</b>       |                        |               |                               |                |                        |                |                        |               |
| Central lab/YSI               | 1,171                  | 312           | -3 (-18, +10)                 | -10 (-27, +8)  | 9% (5%, 19%)           | 15% (7%, 23%)  | 78%                    | 72%           |
| GlucoScout                    | 2,342                  | 1,103         | +2 (-14, +16)                 | -13 (-26, 0)   | 13% (6%, 22%)          | 14% (6%, 23%)  | 71%                    | 70%           |
| HemoCue                       | 114                    | 251           | -16 (-33,+4)                  | -31 (-50, -15) | 19% (9%, 27%)          | 24% (15%, 40%) | 54%                    | 39%           |
| <b>Calibration of studies</b> |                        |               |                               |                |                        |                |                        |               |
| Capillary                     | 866                    | 661           | -7 (-28, +11)                 | -24 (-43, -3)  | 13% (6%, 23%)          | 20% (11%, 32%) | 68%                    | 54%           |
| Venous                        | 2,761                  | 1,005         | +1 (-12, +15)                 | -11 (-23, +1)  | 12% (6%, 21%)          | 13% (6%, 21%)  | 75%                    | 73%           |

<sup>a</sup>Difference=continuous glucose monitoring value minus reference value. Data are median values (25<sup>th</sup>, 75<sup>th</sup> percentiles).

<sup>b</sup>Relative absolute difference (RAD)=absolute difference/reference. Data are median values (25<sup>th</sup>, 75<sup>th</sup> percentiles).

<sup>c</sup>International Organization for Standardization (ISO) criteria are continuous glucose monitoring measurements within  $\pm 15$  mg/dL for reference glucose values  $\leq 75$  mg/dL and within  $\pm 20\%$  for reference glucose values  $>75$  mg/dL.
